# Supplementary material
Source: PubMed Central journal article supplement (PMC6726489)
Supplement: EMS83540-supplement-1.pdf [file EMS83540-supplement-1.pdf]

# Supplementary Information for

## “Selenium isotopes as tracers of a late volatile contribution to Earth from the outer Solar System”

### Supplementary Notes

#### S1 Sample description

Detailed sample information is summarized in Supplementary Table S1. Nine spinel-bearing mantle peridotites from different post-Archean settings and localities including the Pyrenean and Ronda orogenic massifs and the Lanzo and External Ligurides transitional massifs were analyzed in this study. We have also included two peridotite xenoliths hosted by Cenozoic alkali basalts from the French Massif Central (FMC) to cover a wider range of tectonic settings and ages. The incorporation of Ronda, Pyrenees and External Ligurides massifs to the subcontinental lithospheric mantle (SCLM) has been dated as Mid-Proterozoic on the basis of whole-rock Os model ages<sup>48,49</sup>. According to Nd model ages, the northern and central part of the Lanzo massif (sampled by peridotite L212) were isolated from the convective mantle in the late Proterozoic/early Palaeozoic<sup>50</sup>. Selected xenoliths come from the southern part of the FMC, interpreted as SCLM accreted or rejuvenated during the Variscan orogeny<sup>51</sup>.

Most of the selected peridotites have been extensively studied for their major and trace element compositions, including platinum-group element<sup>23,24,47,52-57</sup> (Supplementary Table S1), and Se abundances<sup>5,16,22,44,47</sup> (Supplementary Table S2). Exception is sample 15/EDL-007, for which we provide the whole-rock major and trace element data in Supplementary Table S4.

These samples cover a wide range of rock texture, mineralogy and geochemical features usually

25 reported for mantle rocks. Samples mostly from the Pyrenees comprise LREE-depleted,  
26 amphibole-free, coarse-granular to mylonitic fertile orogenic lherzolites (TUR 7, FONB 93, 84-1,  
27 15 EDL-007, LiX) along with a highly refractory harzburgite (64-3). All these rocks are devoid  
28 of modal metasomatism features apart from minor pargasite in 84-1. Three other orogenic  
29 peridotites display clear evidence of melt-rock interactions: L212 (Lanzo), a cpx-poor lherzolite,  
30 displays selective enrichment in LREE over HREE interpreted as produced by chromatographic  
31 fractionation of a percolating melt<sup>50</sup>. The two Ronda lherzolites are from the fine-granular  
32 domain of the Ronda peridotite massif that was affected by pervasive porous melt flow<sup>58</sup>. DR-29  
33 is an olivine-rich "secondary" lherzolite resulting from melt/rock reactions at increasing melt  
34 mass. Moreover, it contains abundant disseminated Ti pargasite. DR 33 is an amphibole-free cpx-  
35 poor lherzolite showing abundant euhedral Cr spinel and secondary cpx, which were precipitated  
36 by melt-rock reaction at decreasing melt volume. The two French Massif Central xenoliths are a  
37 coarse-granular LILE and LREE enriched lherzolite with secondary phases (5SC30) and a  
38 depleted lherzolite (EG3)<sup>23,24</sup>.

39 Selected peridotites show no correlation with petrogenetic indicators of melt  
40 depletion/metasomatism such as Al<sub>2</sub>O<sub>3</sub> contents (Fig. 1b), or Pd/Ir ratios, considered sensitive  
41 tracers of refertilization and metasomatic processes affecting the HSEs and Se-Te systematics<sup>16,59</sup>  
42 (Supplementary Figure S1), further supporting that partial melting and metasomatism do not  
43 produce a Se isotopic variation in mantle peridotites.

#### 44 S2 Reproducibility and accuracy of Se measurements

45 Accuracy of Se concentration analyses was checked against the USGS reference material BHVO-  
46 2 (Hawaiian basalt). We report an average value of  $170 \pm 4$  ng g<sup>-1</sup> Se (n = 4) in agreement with  
47 previously published values<sup>20,44,60</sup> (Supplementary Table S2). Reproducibilities of Se

48 concentration measurements estimated from at least 4 replicate analyses of peridotites were better  
49 than ~3% r.s.d. (Supplementary Table S2), similar to the long-term analytical reproducibility of  
50 3% r.s.d. reported by Yierpan, et al. <sup>20</sup> in different reference materials.

51 The long-term analytical reproducibility of Se isotope measurements is 0.07‰ based on  
52 multiple analyses of the inter-laboratory standard solution MH-495 (Supplementary Table S3). In  
53 addition, the analytical reproducibility obtained from peridotite samples analyzed multiple times  
54 ( $n \geq 5$ ) is 0.10‰ (see Methods and Supplementary Table S2). An exception is harzburgite 64-3,  
55 with a relatively poor reproducibility of  $\pm 0.20\text{‰}$  (2 s.d.,  $n=3$ ) that may be attributed to sample  
56 heterogeneity or to measurement-related uncertainties such as low signals on <sup>82</sup>Se. For this  
57 particular sample, it has been shown that heterogeneity plays an important role in its Se  
58 concentration reproducibility, where the more material was digested, the better the  
59 reproducibility<sup>44</sup>. Although in our case the Se concentration reproducibility is 3% r.s.d.  
60 (Supplementary Table S2), the depleted Se content ( $\text{Se} = 5.79 \pm 0.17 \text{ ng g}^{-1}$ , Supplementary Table  
61 S2) may contribute to the poor reproducibility of its Se isotopic composition. On the other hand,  
62 internal errors (s.e.) of Se isotope measurements are inversely correlated with the measured  
63 signals on <sup>82</sup>Se and with the amount of Se analyzed (Supplementary Table S2, Supplementary  
64 Figure S2). These correlations show that analyses of low Se contents (~7 ng of Se) have the  
65 highest internal errors (up to 0.11‰, 2 s.e.; Supplementary Table S2), as also described by  
66 Kurzawa, et al. <sup>21</sup> and which may result in poor reproducibility of the  $\delta^{82/76}\text{Se}$  measurements.  
67 However, no apparent correlation is observed between the measured signals on <sup>82</sup>Se (as low as  
68 0.2 V) or the amount of Se analyzed and the  $\delta^{82/76}\text{Se}$  of the samples (Supplementary Table S2,  
69 Supplementary Figure S2).

70 No high-precision Se isotopic data have been published for peridotites following the  
71 pioneering study of Rouxel, et al. <sup>27</sup>, who provided the first Se isotopic value for the USGS

72 reference peridotite (PCC-1) and for the BSE (Fig. 2). Thus, we performed an accuracy test for  
 73 the type of peridotite-matrix analyzed here, already tested in standard solutions<sup>21</sup> and previously  
 74 used for testing other isotope systems<sup>61,62</sup>. Increasing amounts of the fertile Iherzolite TUR 7  
 75 (from ~5 to 50 ng of Se) were admixed to a constant amount of MH-495 reference material (~10  
 76 or 200 ng of Se) (Supplementary Table S5). Each mixture was then spiked accordingly to its Se  
 77 concentration and processed as a normal sample. The measured  $\delta^{82/76}\text{Se}$  of the mixtures are  
 78 positively correlated with the fraction of Se from TUR 7, forming a mixing line between the  
 79  $\delta^{82/76}\text{Se}$  of the end members TUR 7 and MH-495 ( $r^2= 0.99$ ) and remaining within maximum  
 80 uncertainty of 0.14‰ (Supplementary Figure S3). These results demonstrate that we can discard  
 81 potential bias induced by peridotite-matrix or interferences during analysis.

### 82 S3 Potential mixtures between chondrite-like material

#### 83 *a) Mixtures between CM chondrites Murchison and Mighei*

84 A potential mixture between the CM chondrites Murchison and Mighei could result in a Se  
 85 isotope signature that fits with that of the BSE. To calculate the possible range of mixtures we  
 86 use the following mass balance equation:

$$87 \quad \frac{f \times C_1 \times \delta^{82/76}\text{Se}_1 + (1-f) \times C_2 \times \delta^{82/76}\text{Se}_2}{f \times C_1 + (1-f) \times C_2} = \delta^{82/76}\text{Se}_{BSE} \quad (\text{Eq.1})$$

- 88
- 89  $f$  : Fraction of Murchison in the mixture  
 90  $1 - f$  : Fraction of Mighei in the mixture  
 91  $C_1$  : Se concentration of Murchison ( $\mu\text{g/g}$ )  
 92  $C_2$  : Se concentration of Mighei ( $\mu\text{g/g}$ )  
 93  $\delta^{82/76}\text{Se}_1$  : Se isotope signature of Murchison (‰)  
 94  $\delta^{82/76}\text{Se}_2$  : Se isotope signature of Mighei (‰)  
 95  $\delta^{82/76}\text{Se}_{BSE}$  : Se isotope signature of BSE from this study (‰)  
 96

97 Se concentrations of Murchison ( $12.7 \pm 0.8 \mu\text{g g}^{-1}$ ) and Mighei ( $24.3 \pm 1.4 \mu\text{g g}^{-1}$ ) and  
98 their respective  $\delta^{82/76}\text{Se}$  values ( $0.20 \pm 0.13\%$  and  $-0.30 \pm 0.10\%$ ) used in the equation are from  
99 Labidi, et al.<sup>19</sup>. Our calculations result in a  $f$  value, fraction of Murchison in the mixture, that  
100 ranges between 0.49 and 0.89 ( $f = 0.69 \pm 0.20$ ) and thus allows for proportional contributions  
101 from Mighei that range between 0.11 and 0.51. The uncertainty was calculated by propagating  
102 the errors associated with the concentration of Se in both chondrites (Supplementary Table S6)  
103 and the uncertainties of the  $\delta^{82/76}\text{Se}$  values<sup>19</sup>.

#### 104 *b) Potential mixtures of CI and different types of chondrite-like material*

105 Potential mixtures between CI and different types of chondrite-type material might also account  
106 for the Se isotope composition of the BSE. Following Eq. 1, we calculate mixtures between CI  
107 and CO, CV, each sub-type of CM (Mighei and Murchison), ordinary and enstatite chondrites  
108 that would result in a Se isotope signature that fits with that of the BSE (Supplementary Table  
109 S7). Our calculations show that for all potential mixtures, the average contribution from a CI  
110 chondrite-like material is always higher than 85%, and in most cases higher than 90% (CI-  
111 Enstatite; CI-Murchison and CI-Mighei), clearly indicating that carbonaceous chondrites  
112 dominated the late-accreted material. The uncertainty for each mixture was calculated by  
113 propagating the errors associated with the concentration of Se in both components  
114 (Supplementary Tables S6 and S7) and the uncertainties of the  $\delta^{82/76}\text{Se}$  values<sup>19</sup>.

#### 115 S4 Mass of the late veneer and its contribution to the volatile budget of the BSE

116 To calculate the mass of the late veneer we considered that ~40% of S is in the pre-late veneer  
117 mantle<sup>30</sup> and use a BSE S content of  $200 \pm 40 \mu\text{g/g}$ <sup>31</sup>. To obtain the percentage of the Earth's  
118 mass added to the BSE by a CI or CM chondrite-like late veneer ('a' term) we use the same mass  
119 balance approach than in the mixture of chondrite material (see above):

120  
 121 
$$C_{BSE}^X \times M_{BSE} = C_{CC}^X \times a \times M_E + C_{PLV}^X \times (M_{BSE} - a \times M_E) \quad \text{Eq.2}$$

122  
 123  
 124  $C_{BSE}^X$ : Concentration of element X in the BSE  
 125  $C_{CC}^X$ : Concentration of element X in the chondrite  
 126  $C_{PLV}^X$ : Concentration of element X in the pre-late veneer mantle  
 127  $a$ : Percentage of the Earth's mass added to the BSE by the late veneer  
 128  $M_{BSE}$ ,  $M_E$ : mass of the BSE and the Earth from <sup>31</sup>, and references therein  
 129

130 Abundances ( $\pm$  s.d.) of CI and CM chondrite elements used in Eq. 2 are reported in  
 131 Supplementary Table S6<sup>5,18-19,60,63</sup>. Our results show that  $0.15 \pm 0.03\%$  of the Earth's mass would  
 132 be added by a CI chondrite-like late veneer, which is lower than the  $0.26 \pm 0.05 \%$  resulting if we  
 133 consider CM chondrite-like late veneer. The associated uncertainties in both calculations were  
 134 calculated by propagating the errors associated with the concentration of S, Se and  $\delta^{82/76}\text{Se}$ , both  
 135 in the BSE and chondrites (CI or Murchison and Mighei mixture; Supplementary Table S6).  
 136 More complex scenarios involving mixtures of CI and different types of chondrite-type material  
 137 (c.f. S3b) would result in a late veneer of 0.15-0.16% the Earth's mass. Abundances ( $\pm$  s.d.),  
 138 fractions and estimated late veneer mass of potential mixtures are reported in Supplementary  
 139 Table S7.

140 Since the late veneer delivered 100% of Se and Te based on their partition coefficients<sup>9</sup>, a  
 141 CI chondrite-like late veneer would result in Se and Te BSE abundances of  $47 \pm 9$  and  $5 \pm 1$  ng g<sup>-1</sup>  
 142 <sup>1</sup>, respectively (Supplementary Table S6). These BSE estimates are within error of those obtained  
 143 assuming a CM chondrite-like late veneer (Se =  $65 \pm 17$  ng g<sup>-1</sup>; Te =  $6 \pm 1$  ng g<sup>-1</sup>; Supplementary  
 144 Table S6). Our results imply Se and Te BSE abundances lower than previous estimates based on  
 145 Se and Te contents and relative proportions in mantle fertile lherzolites ( $\sim 80$  ng g<sup>-1</sup> of Se and  $\sim 11$   
 146 ng g<sup>-1</sup> of Te)<sup>5,6,31</sup>. It has been shown however that Se-Te systematics in peridotites might not be

147 representative of the BSE and instead represent the result of refertilization and metasomatic  
148 processes<sup>16,17</sup>.

149         Regarding other elements such as water, carbon and nitrogen, the contribution of the late  
150 veneer would have been heterogeneous and it relies on how well constrained are the estimate  
151 BSE abundances of these elements (Supplementary Table S6). Following Palme and O'Neill<sup>31</sup>  
152 water content in the BSE, a CI chondrite-like late veneer would have provided either ~20-40% of  
153 water if the Earth has chondritic refractory lithophile element ratios, i.e. a water abundance of  
154  $1100 \pm 220 \mu\text{g g}^{-1}$ , or ~30-60% of water if Earth is non-chondritic (BSE water of  $675 \pm 135 \mu\text{g g}^{-1}$ ).  
155 Similarly, a CM chondrite-like late veneer would have delivered either ~25-45% or ~40-70%  
156 of water assuming a chondritic or a non-chondritic model, respectively. Hirschmann<sup>64</sup>  
157 constrained the carbon content in the BSE, providing two different estimates of  $90 \pm 27 \mu\text{g g}^{-1}$   
158 and  $108 \pm 34 \mu\text{g g}^{-1}$ . According to those estimates, a CI chondrite-like late veneer would have  
159 delivered ~57-120% or ~46 – 100% of the BSE carbon, respectively, whereas a CM chondrite-  
160 like late veneer would have delivered ~60-130% or ~50 – 110%. These estimates imply that a CI  
161 or CM chondrite-like late veneer could have delivered more than 100% of the BSE carbon.  
162 Recent studies, however, have suggested that ~10-30% of the present day carbon budget  
163 corresponds to pre-late veneer mantle abundances<sup>39</sup>, which supports that the late veneer delivered  
164 ~80% of the BSE carbon budget, in agreement with the average values provided by our  
165 calculations. Nitrogen abundance in the BSE ( $1.9 \pm 0.37 \mu\text{g g}^{-1}$ ,<sup>65</sup>) is much lower than the  
166 calculated amounts delivered by the late veneer (CI chondrite contribution:  $4.3 \pm 1.1 \mu\text{g g}^{-1}$ ; CM  
167 chondrite contribution:  $3.8 \pm 1.8 \mu\text{g g}^{-1}$ ; Supplementary Table S6). However, the excess nitrogen  
168 abundance (CI chondrite contribution: between 120 to 320%; CM chondrite contribution:  
169 between 80 to 320%) can be reconciled with considerable atmospheric loss<sup>41</sup> after the late  
170 veneer. This does not preclude that nitrogen was already in the mantle previous to the late veneer.

171 **Supplementary Table Captions**

172

173 **Supplementary Table S1.**

174 Details on rock types, localities, Al<sub>2</sub>O<sub>3</sub> content and Pd<sub>N</sub>/Ir<sub>N</sub> ratios of selected peridotites.

175 **Supplementary Table S2.**

176 Detailed information about the Se data obtained per sample measurement together with published

177 data.

178 **Supplementary Table S3.**

179 The  $\delta^{82/76}\text{Se}$  value of the inter-laboratory standard MH 495 (30 ng mL<sup>-1</sup> Se) measured together

180 with the samples in this study and previously reported

181 **Supplementary Table S4.**

182 New major and trace element data for peridotite 15/EDL-007.

183 **Supplementary Table S5.**

184 Se isotope data of mixtures between MH-495 standard and peridotite TUR-7.

185 **Supplementary Table S6.**

186 Recent estimates of the volatile content of carbonaceous chondrites and the BSE, together with

187 the estimated contribution of a CI and CM chondrite-like late veneer.

188 **Supplementary Table S7.**

189 Summary of potential mixtures between CI chondrite-like material and different types of

190 chondrites that could result in a Se isotope signature that would overlap that of the BSE.

191

192



193 **Supplementary Figures**  
194  
195

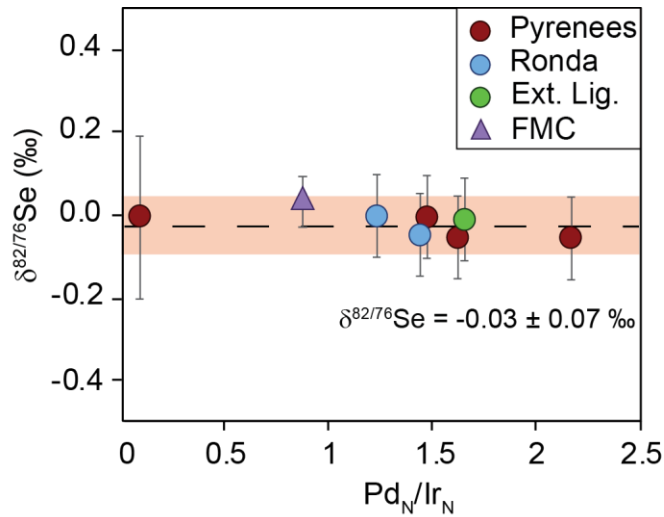

196  
197

198 **Supplementary Figure S1.  $\text{Pd}_N/\text{Ir}_N$  vs. Se isotope data of mantle peridotites.**

199 Circles represent orogenic and transitional peridotites and triangles mantle xenoliths. N = CI-  
200 chondrite normalized <sup>31</sup>. Error bars indicate 2 s.d. uncertainties of more than two combined  
201 measurements. If not available, the analytical uncertainty obtained for repeated analyses of  
202 peridotites is reported ( $\pm 0.10$ ‰, 2s.d.) (see Methods). The shaded field represents the 2 s.d. of  
203 the mean of peridotites as discussed in the text. Pd and Ir concentrations are taken from published  
204 data using the same pulverized powder batch (Supplementary Table S1).

205

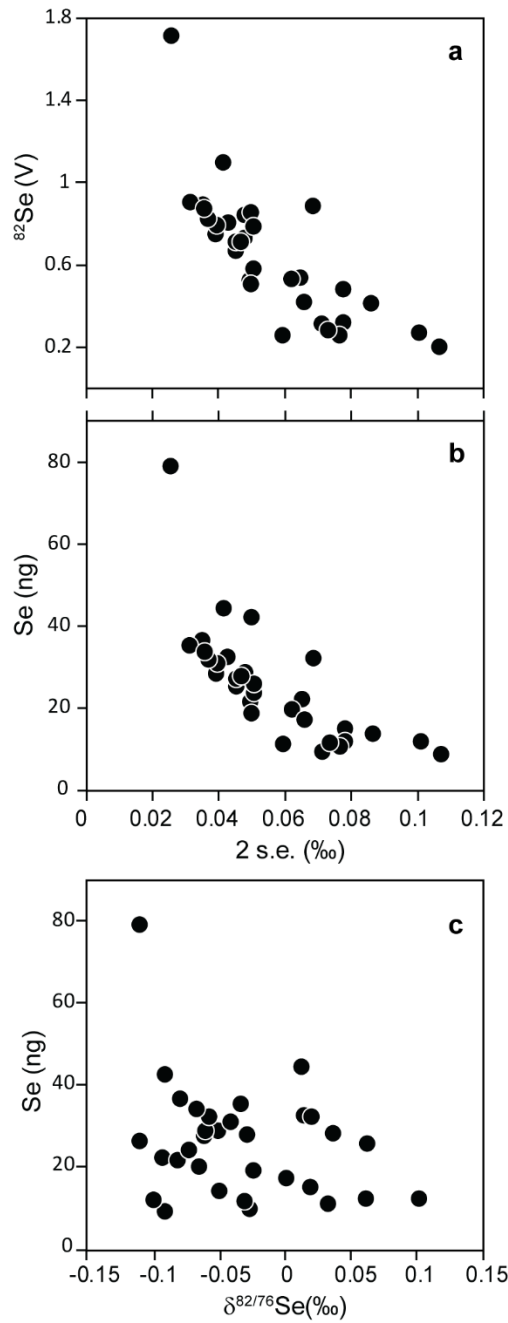

206  
207

208 **Supplementary Figure S2. Data obtained during Se isotope measurements of peridotites.**

209 Internal errors (s.e.) vs. (a) measured signals on  $^{82}\text{Se}$  and (b) amount of Se analyzed. (c)  $\delta^{82/76}\text{Se}$

210 (‰) vs. the amount of Se analyzed (Supplementary Table S2).

211  
212

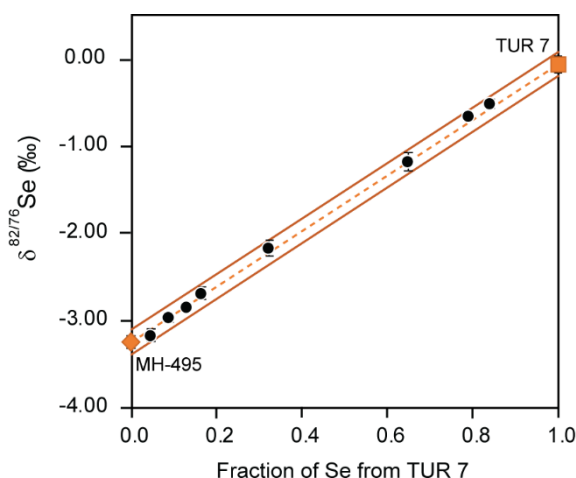

213  
 214  
 215  
 216 **Supplementary Figure S3. Accuracy test.**  $\delta^{82/76}\text{Se}$  (‰) values of the mixture between a  
 217 constant amount of the standard solution MH-495 (~10 or 200 ng of Se) and different amounts of  
 218 the fertile lherzolite TUR 7 (from ~5 to 50 ng of Se) vs. the fraction of Se from TUR 7. Error bars  
 219 represent the internal precision of sample measurement reported as 2 s.e. (Supplementary Table  
 220 S5). The doped samples fall on the range defined by the Se isotope compositions of the end  
 221 members MH-495 ( $\delta^{82/76}\text{Se} = -3.25 \pm 0.07$  ‰, Supplementary Table S3) and TUR 7 ( $\delta^{82/76}\text{Se} = -$   
 222  $0.06 \pm 0.10$  ‰; Supplementary Table S2) and remain within maximum uncertainty of 0.14‰ (2  
 223 s.d.).

224

## 225 **Supplementary References**

- 226 48 Reisberg, L. & Lorand, J. P. Longevity of sub-continental mantle lithosphere from  
 227 osmium isotope systematics in orogenic peridotite massifs. *Nature* **376**, 159-162 (1995).  
 228 49 Snow, J. E., Schmidt, G. & Rampone, E. Os isotopes and highly siderophile elements  
 229 (HSE) in the Ligurian ophiolites, Italy. *Earth and Planetary Science Letters* **175**, 119-132  
 230 (2000).  
 231 50 Bodinier, J.-L., Menzies, M. A. & Thirlwall, M. F. Continental to Oceanic Mantle  
 232 Transition—REE and Sr-Nd Isotopic Geochemistry of the Lanzo Lherzolite Massif.  
 233 *Journal of Petrology* **Special\_Volume**, 191-210 (1991).  
 234 51 Lenoir, X., Garrido, C., Bodinier, J. & Dautria, J. Contrasting lithospheric mantle  
 235 domains beneath the Massif Central (France) revealed by geochemistry of peridotite  
 236 xenoliths. *Earth and Planetary Science Letters* **181**, 359-375 (2000).

237 52 Lorand, J.-P., Pattou, L. & Gros, M. Fractionation of Platinum-group Elements and Gold  
238 in the Upper Mantle: a Detailed Study in Pyrenean Orogenic Lherzolites. *Journal of*  
239 *Petrology* **40**, 957-981 (1999).

240 53 Luguët, A., Shirey, S. B., Lorand, J.-P., Horan, M. F. & Carlson, R. W. Residual  
241 platinum-group minerals from highly depleted harzburgites of the Lherz massif (France)  
242 and their role in HSE fractionation of the mantle. *Geochimica et Cosmochimica Acta* **71**,  
243 3082-3097 (2007).

244 54 Van der Wal, D. & Bodinier, J. L. Origin of the recrystallisation front in the Ronda  
245 peridotite by km-scale pervasive porous melt flow. *Contributions to Mineralogy and*  
246 *Petrology* **122**, 387-405 (1996).

247 55 Lorand, J. P., Keays, R. R. & Bodinier, J. L. Copper and Noble Metal Enrichments Across  
248 the Lithosphere—Asthenosphere Boundary of Mantle Diapirs: Evidence from the Lanzo  
249 Lherzolite Massif. *Journal of Petrology* **34**, 1111-1140 (1993).

250 56 Becker, H. *et al.* Highly siderophile element composition of the Earth's primitive upper  
251 mantle: Constraints from new data on peridotite massifs and xenoliths. *Geochimica et*  
252 *Cosmochimica Acta* **70**, 4528-4550 (2006).

253 57 Luguët, A., Lorand, J.-P., Alard, O. & Cottin, J.-Y. A multi-technique study of platinum  
254 group element systematic in some Ligurian ophiolitic peridotites, Italy. *Chemical Geology*  
255 **208**, 175-194 (2004).

256 58 der Wal, D. V. & Bodinier, J. L. Origin of the recrystallisation front in the Ronda  
257 peridotite by km-scale pervasive porous melt flow. *Contributions to Mineralogy and*  
258 *Petrology* **122**, 387-405 (1996).

259 59 Luguët, A., Behrens, M., Pearson, D. G., König, S. & Herwartz, D. Significance of the  
260 whole rock Re–Os ages in cryptically and modally metasomatised cratonic peridotites:  
261 Constraints from HSE–Se–Te systematics. *Geochimica et Cosmochimica Acta* **164**, 441-  
262 463 (2015).

263 60 Wang, Z., Becker, H. & Wombacher, F. Mass Fractions of S, Cu, Se, Mo, Ag, Cd, In, Te,  
264 Ba, Sm, W, Tl and Bi in Geological Reference Materials and Selected Carbonaceous  
265 Chondrites Determined by Isotope Dilution ICP-MS. *Geostandards and Geoanalytical*  
266 *Research* **39**, 185-208 (2015).

267 61 Nielsen, S. G., Rehkämper, M., Baker, J. & Halliday, A. N. The precise and accurate  
268 determination of thallium isotope compositions and concentrations for water samples by  
269 MC-ICPMS. *Chemical Geology* **204**, 109-124 (2004).

270 62 Tipper, E. T., Louvat, P., Capmas, F., Galy, A. & Gaillardet, J. Accuracy of stable Mg  
271 and Ca isotope data obtained by MC-ICP-MS using the standard addition method.  
272 *Chemical Geology* **257**, 65-75 (2008).

273 63 Braukmüller, N., Wombacher, F., Hezel, D. C., Escoube, R. & Münker, C. Ta.  
274 *Geochimica et Cosmochimica Acta* **239**, 17-48 (2018).

275 64 Hirschmann, M. M. Constraints on the early delivery and fractionation of Earth's major  
276 volatiles from C/H, C/N, and C/S ratios. *American Mineralogist* **101**, 540-553 (2016).

277 65 Marty, B. & Dauphas, N. The nitrogen record of crust–mantle interaction and mantle  
278 convection from Archean to Present. *Earth and Planetary Science Letters* **206**, 397-410  
279 (2003).

280  
281  
282  
283
